# Supplementary material for: The Influence of Recommendation of Medical and Non-Medical Authorities on the Decision to Vaccinate against Influenza from a Social Vaccinology Perspective: Cross-Sectional, Representative Study of Polish Society
Source: MDPI journal article supplement (doi:10.3390/vaccines11050994), 2023-05-17
Supplement: s1 [file s1]

---

## Supplementary Materials

The Questionnaire (translated from Polish to English)

### TRUST IN MEDICAL AND NON-MEDICAL AUTHORITIES ON THE ISSUE OF INFLUENZA VACCINATION

Dear Sirs,

*The following questionnaire is the basic stage of a research project aimed at finding out the attitudes of the Polish public toward influenza vaccination.*

Participation in the study is voluntary.

*The survey is confidential, and the data obtained from the survey will be analyzed collectively. Any identification of responses with a specific person completing the survey questionnaire will be impossible.*

*If you choose to participate in the survey, please proceed to the next section, if not, please complete the survey.*

1. **If your doctor recommended that you be vaccinated against a disease, then:**
  - a. I would vaccinate/vaccinate without hesitation
  - b. I would/should vaccinate, but I would/should consult another professional beforehand, e.g., another doctor or nurse.
  - c. I would/should vaccinate myself, but before that I would have to/should read about the vaccination on the Internet
  - d. A doctor's recommendation would not have affected my decision to vaccinate
2. **To what extent would the opinion/opinion of the following people matter if you wanted to get vaccinated against influenza? Scale from 1 to 5, where 1 means "very low influence" and 5 means "very high influence".**
  - a. Nurse
  - b. Doctor
  - c. Pharmacist in a pharmacy
  - d. Someone from the family/friends
3. **Have you been vaccinated against COVID-19?**
  - a. Yes, I have, the first doses during the pandemic and the booster dose(s)
  - b. Yes, I have, but only with the first doses during the pandemic, no booster doses
  - c. I have not
4. **Is the COVID-19 pandemic and the related discussion on vaccination:**
  - a. Strengthened your confidence in vaccination
  - b. You have weakened your confidence in vaccination
  - c. You have not changed your approach to vaccination

---

5. What is your attitude toward vaccinations in general - regardless of what diseases they are given against and to whom they are given (children, adults)?

- a. Strong vaccine supporter
- b. Moderate vaccine supporter
- c. Moderate vaccine opponent
- d. Strong vaccine opponent
